# Supplementary material for: Chiral molecule induced valley polarization enhancement of MoS2
Source: Royal Society of Chemistry journal article supplement (doi:10.1039/d2cp04397a), 2023-01-01
Supplement: d2cp04397a1.pdf [file d2cp04397a1.pdf]

## Supplementary Material

### Chiral molecule induced valley polarization enhancement of MoS<sub>2</sub>

Guangcun Gao<sup>1#</sup>, Jintong Zhu<sup>1#</sup>, Songrui Wei<sup>2#</sup>, Yang Cao<sup>1</sup>, Wei Huang<sup>1</sup>, Zhongxin Liu<sup>1</sup>, Jieqiong Wang<sup>\*1</sup> and Yijun Shen<sup>\*1</sup>

<sup>1</sup>State Key Laboratory of Marine Resource Utilization in South China Sea, School of Chemical Engineering and Technology, School of Materials Science and Engineering, Hainan University, Haikou 570228, P. R. China

<sup>2</sup>College of Physics and Optoelectronic Engineering, Shenzhen University, Nanshan Ave 3688, Shenzhen, Guangdong, 518080, P. R. China

<sup>a</sup>) Author to whom correspondence should be addressed: wangjq@hainanu.edu.cn

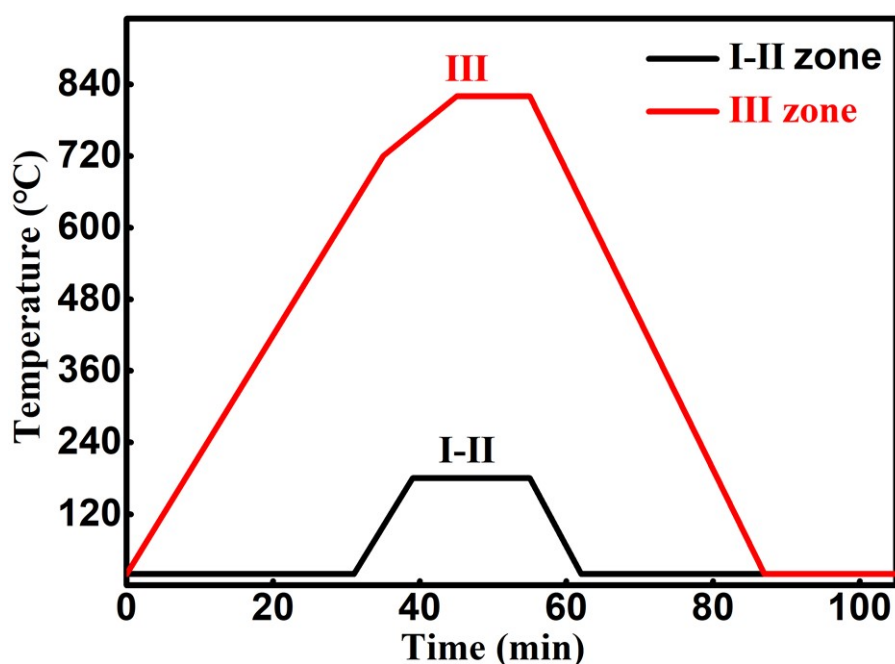

FIG. S1. Graph of quartz tube temperature zone control about preparing MoS<sub>2</sub> monolayer.

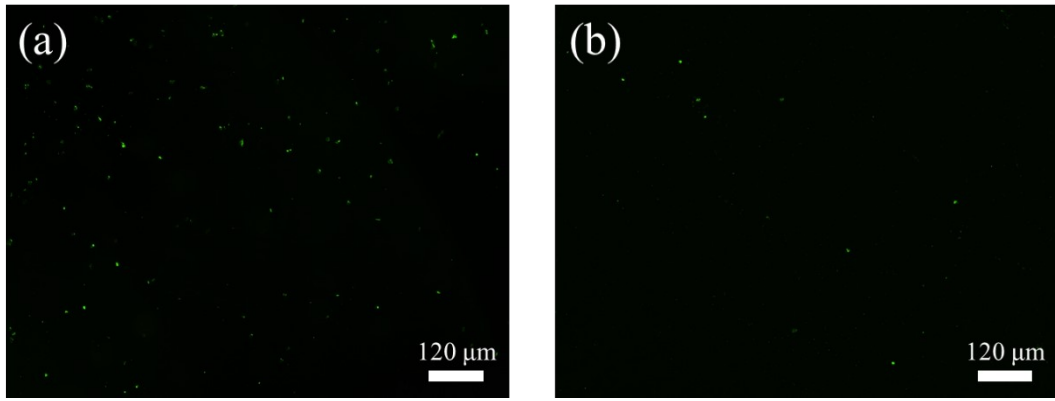

FIG. S2. Representative images examined under a fluorescence microscope. (a) L-histidine-coated MoS<sub>2</sub> monolayers. (b) DL-histidine-coated MoS<sub>2</sub> monolayers.
